# Supplementary material for: Automatic identification and morphological comparison of bivalve and brachiopod fossils based on deep learning
Source: PeerJ journal article supplement (doi:10.7717/peerj.16200), 2023-10-11
Supplement: AppendixS4.pdf [file AppendixS4.pdf]

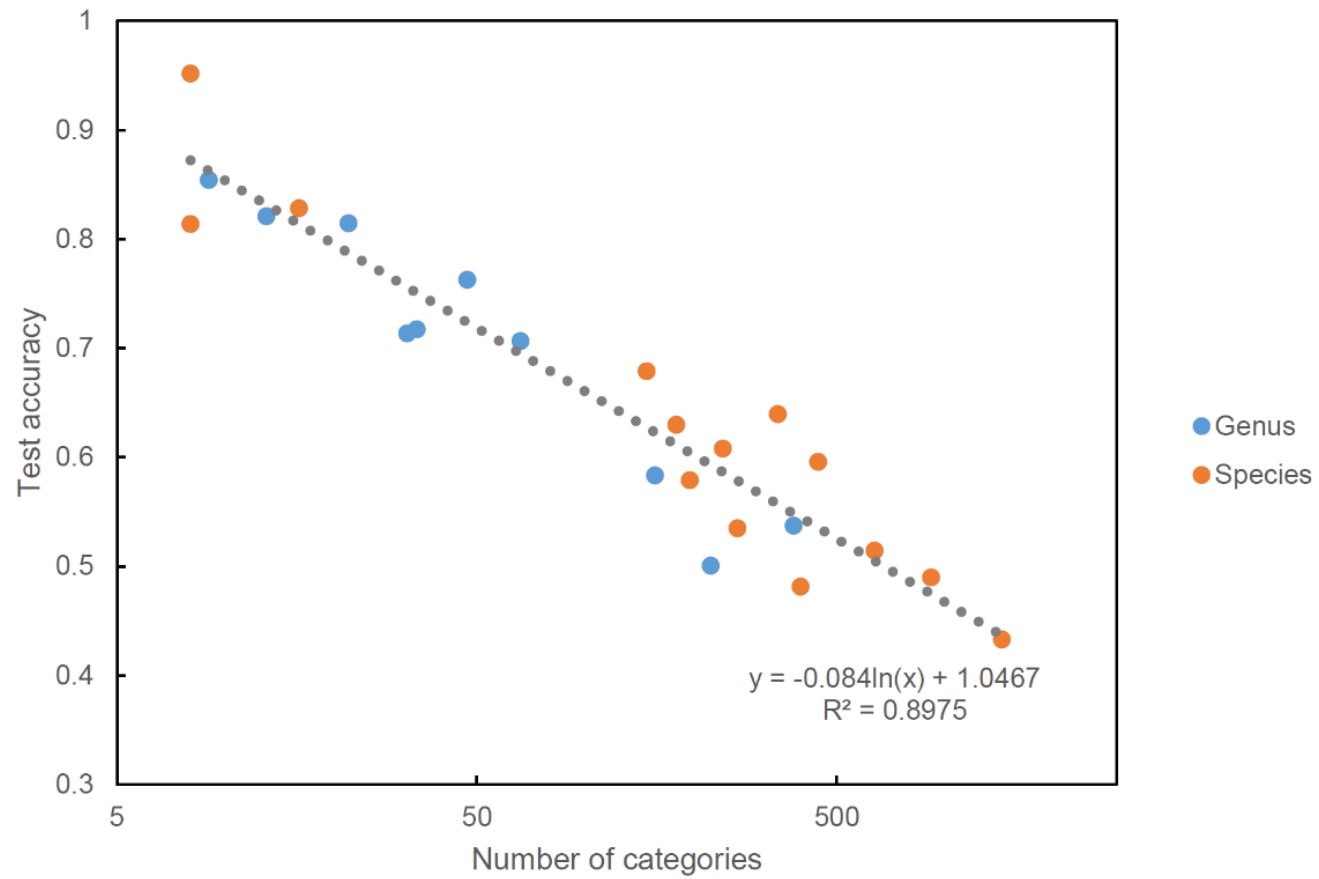

**Appendix S4.** Relationship between the number of categories and the accuracy. The two correspond well to the logarithmic relationship.
