# Supplementary material for: Automatic identification and morphological comparison of bivalve and brachiopod fossils based on deep learning
Source: PeerJ journal article supplement (doi:10.7717/peerj.16200), 2023-10-11
Supplement: AppendixS5.pdf [file AppendixS5.pdf]

|                                                                                  |                                                                                   |                                                                                   |                                                                                    |                                                                                     |
|----------------------------------------------------------------------------------|-----------------------------------------------------------------------------------|-----------------------------------------------------------------------------------|------------------------------------------------------------------------------------|-------------------------------------------------------------------------------------|
|   |   |   |   |   |
| <i>Bakevella</i>                                                                 | <i>Claraia</i>                                                                    | <i>Costatoria</i>                                                                 | <i>Daonella</i>                                                                    | <i>Eumorphotis</i>                                                                  |
|  |  |  |  |  |
| <i>Halobia</i>                                                                   | <i>Leptochondria</i>                                                              | <i>Monotis</i>                                                                    | <i>Neoschizodus</i>                                                                | <i>Promyalina</i>                                                                   |
|  |  |  |                                                                                    |                                                                                     |
| <i>Pteria</i>                                                                    | <i>Quemocuomegalodon</i>                                                          | <i>Unionites</i>                                                                  |                                                                                    |                                                                                     |

|                                                                                    |                                                                                     |                                                                                     |                                                                                      |                                                                                      |
|------------------------------------------------------------------------------------|-------------------------------------------------------------------------------------|-------------------------------------------------------------------------------------|--------------------------------------------------------------------------------------|--------------------------------------------------------------------------------------|
| 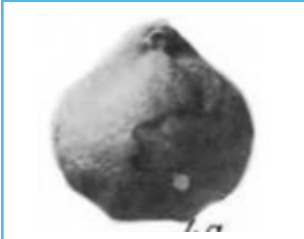  |   |   |   |  |
| <i>Araxathyris</i>                                                                 | <i>Burmirhynchia</i>                                                                | <i>Fusichonetes</i>                                                                 | <i>Juxathyris</i>                                                                    | <i>Paryphella</i>                                                                    |
|  |  |  |  |                                                                                      |
| <i>Piarorhynchella</i>                                                             | <i>Prelissorhynchia</i>                                                             | <i>Pseudospiriferina</i>                                                            | <i>Spiriferina</i>                                                                   |                                                                                      |

**Appendix S5.** Example images of all 22 genera in the scenario of Order 22. These images are all from the test set, where the orange border represents the bivalves and the blue border represents the brachiopods. Fossil images are not to scale.
