# Supplementary material for: Automatic identification and morphological comparison of bivalve and brachiopod fossils based on deep learning
Source: PeerJ journal article supplement (doi:10.7717/peerj.16200), 2023-10-11
Supplement: AppendixTSNE.pdf [file AppendixTSNE.pdf]

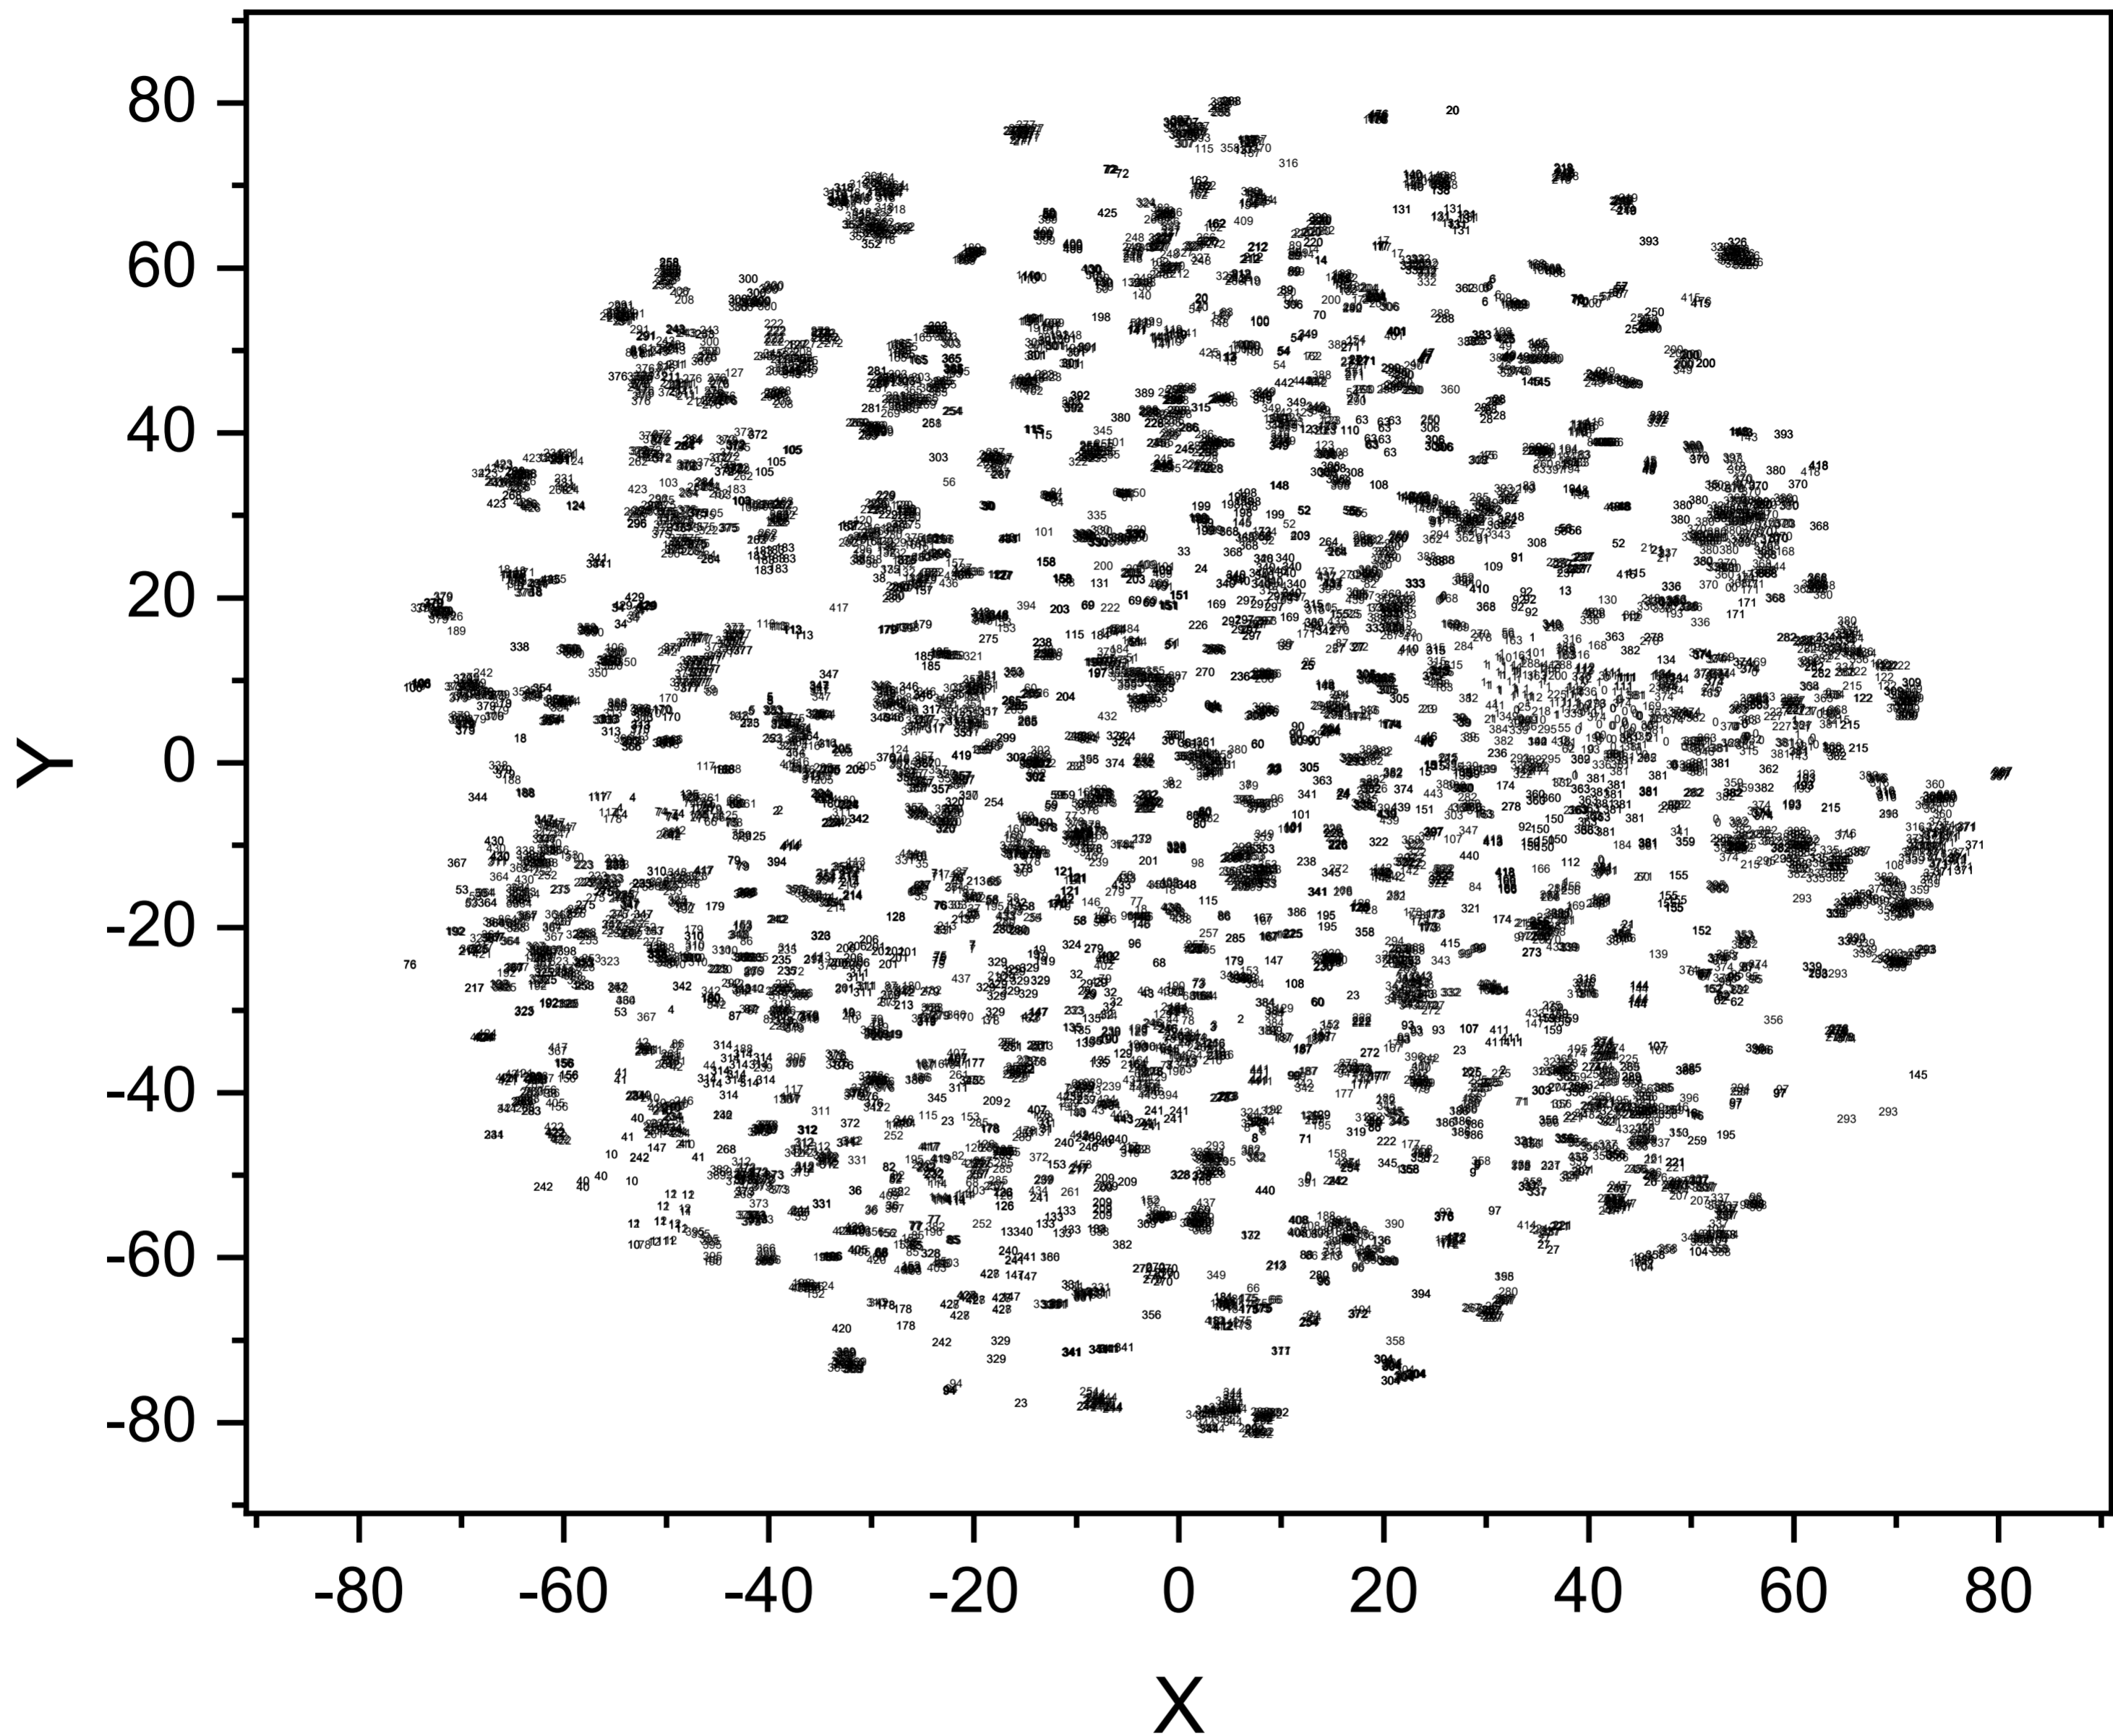

**Appendix.** Fossil morphological feature distribution maps for more categories (444 categories, 8536 fossil images, based on Order 34) calculated by t-SNE. The accuracy of the original identification model is 59.57%. The horizontal and vertical coordinates in the figure are the two dimensions obtained by t-SNE. The numbers represent different species.
