# Supplementary material for: Automatic identification and morphological comparison of bivalve and brachiopod fossils based on deep learning
Source: PeerJ. 2023 Oct 11;11:e16200. doi: 10.7717/peerj.16200 (PMC10576495; doi:10.7717/peerj.16200)
Supplement: Table S1 [file peerj-11-16200-s007.xlsx]

## Sheet: Sheet1
Appendix-Table S1
Detailed data on the number of each category (BBFID-1)
Genus	training set	detailed images	validation set	detailed images	test set	detailed images	total detailed images
Claraia	443	1	147	1	147	1	3
Monotis	200	7	66	0	67	0	7
Eumorphotis	198	3	65	1	66	3	7
Halobia	195	0	64	0	65	0	0
Bakevellia	143	32	47	12	47	5	49
Unionites	136	22	45	5	45	8	35
Daonella	123	5	41	2	41	3	10
Leptochondria	122	4	40	0	41	2	6
Neoschizodus	88	7	29	1	29	0	8
Pteria	85	3	28	1	28	0	4
Costatoria	83	20	27	7	27	7	34
Promyalina	72	4	24	1	24	1	6
Quemocuomegalodon	65	45	21	17	21	16	78
Palaeocardita	60	28	19	10	20	5	43
Plagiostoma	57	4	18	4	19	3	11
Palaeonucula	53	20	17	3	18	4	27
Entolium	52	3	17	1	17	0	4
Permophorus	52	2	17	0	17	1	3
Cassianella	50	20	16	8	16	4	32
Schafhaeutlia	46	16	15	11	15	7	34
Nuculana	42	12	14	3	14	4	19
Myophoria	39	1	12	0	13	2	3
Crittendenia	38	5	12	2	12	3	10
Gervillia	37	13	12	3	12	4	20
Indopecten	37	3	12	0	12	1	4
Chlamys	36	0	12	0	12	1	1
Mysidioptera	36	6	12	3	12	5	14
Modiolus	36	0	11	1	12	1	2
Palaeoneilo	33	3	11	0	11	1	4
Enteropleura	33	2	10	3	11	5	10
Hoernesia	33	12	10	2	11	4	18
Posidonia	33	0	10	0	11	0	0
Trigonodus	32	3	10	0	11	2	5
Towapteria	32	0	10	1	10	0	1
Parallelodon	30	5	10	1	10	5	11
Gryphaea	30	10	9	4	10	5	19
Euchondria	27	2	9	1	9	4	7
Eophilobryoidella	27	20	8	4	9	5	29
Gruenewaldia	26	10	8	1	9	5	16
Austrotindaria	26	6	8	1	8	0	7
Pinna	26	13	8	6	8	4	23
Lhasanella	24	15	8	4	8	4	23
Trigonucula	24	11	8	4	8	5	20
Eobuchia	22	6	7	2	7	1	9
Myophoricardium	22	10	7	0	7	1	11
Palaeolima	22	2	7	1	7	0	3
Pleuromya	22	3	7	0	7	2	5
Bositra	21	0	7	0	7	0	0
Mysidiella	21	9	7	3	7	2	14
Pernopecten	21	2	6	2	7	0	4
Streblopteria	20	5	6	2	7	3	10
Austriellula	20	11	6	6	6	3	20
Gervillaria	20	9	6	1	6	1	11
Sinbadiella	20	9	6	4	6	3	16
Antiquilima	19	/	6	/	6	/	13
Hunanopecten	18	/	6	/	6	/	4
Kolymia	18	/	6	/	6	/	1
Minetrigonia	18	/	6	/	6	/	10
Myophorigonia	18	/	5	/	6	/	11
Neomegalodon	18	/	5	/	6	/	16
Schizodus	16	/	7	/	5	/	6
Harpax	17	/	5	/	6	/	16
Umbrostrea	17	/	5	/	6	/	20
Asoella	17	/	5	/	5	/	1
Myophoriopis	17	/	5	/	5	/	7
Jiangxiella	16	/	5	/	5	/	6
Nuculopsis	16	/	5	/	5	/	3
Pleuronectites	16	/	5	/	5	/	5
Scythentolium	16	/	5	/	5	/	6
Astartella	15	/	5	/	5	/	4
Grammatodon	15	/	5	/	5	/	8
Yunnanophorus	15	/	5	/	5	/	0
Protocardia	15	/	4	/	5	/	4
Septocardia	15	/	4	/	5	/	13
Amussium	14	/	4	/	5	/	3
Myoconcha	14	/	4	/	5	/	2
Mytilus	14	/	4	/	5	/	5
Paradoxipecten	14	/	4	/	4	/	1
Aviculopecten	13	/	4	/	4	/	2
Enantiostreon	13	/	4	/	4	/	7
Eomonotis	13	/	4	/	4	/	0
Healeya	13	/	4	/	4	/	11
Liostrea	13	/	4	/	4	/	15
Promytilus	13	/	4	/	4	/	2
Tutcheria	13	/	4	/	4	/	11
Bakevelloides	12	/	4	/	4	/	2
Caledogonia	12	/	4	/	4	/	14
Camptonectes	12	/	4	/	4	/	4
Etheripecten	12	/	4	/	4	/	3
Meleagrinella	12	/	4	/	4	/	0
Newaagia	12	/	4	/	4	/	9
Homomya	12	/	3	/	4	/	4
Palaeanodonta	12	/	3	/	4	/	2
Heteropecten	11	/	3	/	4	/	3
Otapiria	11	/	3	/	4	/	5
Placunopsis	11	/	3	/	4	/	0
Pseudoplacunopsis	11	/	3	/	4	/	14
Stutchburia	11	/	3	/	4	/	2
Tancredia	11	/	3	/	4	/	7
Cypricardella	11	/	3	/	3	/	0
Myalina	11	/	3	/	3	/	5
Oxytoma	11	/	3	/	3	/	3
Acanthopecten	10	/	3	/	3	/	2
Astarte	10	/	3	/	3	/	2
Entolioides	10	/	3	/	3	/	2
Jurassicorbula	10	/	3	/	3	/	6
Ostrea	10	/	3	/	3	/	0
Palaeopharus	10	/	3	/	3	/	7
Streblochondria	10	/	3	/	3	/	3
Antiquicorbula	9	/	3	/	3	/	8
Elegantinia	9	/	3	/	3	/	4
Neomorphotis	9	/	3	/	3	/	1
Noetlingiconcha	9	/	3	/	3	/	7
Phestia	9	/	3	/	3	/	0
lndopecten	9	/	3	/	3	/	3
Aphanaia	9	/	2	/	3	/	0
Burmesia	9	/	2	/	3	/	1
Filamussium	9	/	2	/	3	/	8
Guizhoupecten	9	/	2	/	3	/	3
Gujocardita	9	/	2	/	3	/	5
Isocyprina	9	/	2	/	3	/	0
Jianchuania	9	/	2	/	3	/	3
Nucinella	9	/	2	/	3	/	8
Praeconia	9	/	2	/	3	/	9
Pseudolimea	9	/	2	/	3	/	1
Pseudomonotis	9	/	2	/	3	/	3
Sementiconcha	9	/	2	/	3	/	6
Vietnamicardium	9	/	2	/	3	/	5
Weyla	9	/	2	/	3	/	3
Cercomya	8	/	2	/	3	/	1
Lima	8	/	2	/	3	/	1
Opokiella	8	/	2	/	3	/	4
Pegmavalvula	8	/	2	/	3	/	6
Persia	8	/	2	/	3	/	4
Protostrea	8	/	2	/	3	/	5
Pseudocorbula	8	/	2	/	3	/	0
Waagenoperna	8	/	2	/	3	/	1
Catella	8	/	2	/	2	/	3
Curionia	8	/	2	/	2	/	0
Edmondia	8	/	2	/	2	/	2
Hayasakapecten	8	/	2	/	2	/	1
Kija	8	/	2	/	2	/	0
Pergamidia	8	/	2	/	2	/	1
Plicatula	8	/	2	/	2	/	1
Promysidiella	8	/	2	/	2	/	0
Tambanella	8	/	2	/	2	/	2
Coelopis	7	/	2	/	2	/	4
Eoplicatula	7	/	2	/	2	/	10
Girtypecten	7	/	2	/	2	/	0
Heminajas	7	/	2	/	2	/	1
Hiatella	7	/	2	/	2	/	0
Maitaia	7	/	2	/	2	/	2
Modesticoncha	7	/	2	/	2	/	6
Pseudomytiloides	7	/	2	/	2	/	0
Ryderia	7	/	2	/	2	/	2
Sanguinolites	7	/	2	/	2	/	3
Cornucardia	6	/	2	/	2	/	8
Dacryomya	6	/	2	/	2	/	6
Eocamptonectes	6	/	2	/	2	/	3
Erugonia	6	/	2	/	2	/	6
Eurydesma	6	/	2	/	2	/	9
Inoperna	6	/	2	/	2	/	0
Janopecten	6	/	2	/	2	/	2
Loxochlamys	6	/	2	/	2	/	3
Parainoceramya	6	/	2	/	2	/	2
Propeamussium	6	/	2	/	2	/	2
Weiyuanella	6	/	2	/	2	/	0
Chaenocardia	6	/	1	/	2	/	3
Guangdongella	6	/	1	/	2	/	0
Isognomon	6	/	1	/	2	/	3
Lopha	6	/	1	/	2	/	2
Mesosaccella	6	/	1	/	2	/	5
Myalinella	6	/	1	/	2	/	4
Opis	6	/	1	/	2	/	5
Palaeophorus	6	/	1	/	2	/	2
Pterinopectinella	6	/	1	/	2	/	2
Weixiella	6	/	1	/	2	/	3
Botulopsis	5	/	1	/	2	/	5
Fransonia	5	/	1	/	2	/	5
Guichiella	5	/	1	/	2	/	0
Lilingella	5	/	1	/	2	/	0
Myonia	5	/	1	/	2	/	1
Nicaniella	5	/	1	/	2	/	2
Noetingiconcha	5	/	1	/	2	/	6
Permianaia	5	/	1	/	2	/	1
Protopis	5	/	1	/	2	/	4
Sichuania	5	/	1	/	2	/	3
Thracia	5	/	1	/	2	/	0
Triaphorus	5	/	1	/	2	/	0
Annuliconcha	5	/	1	/	1	/	0
Atreta	5	/	1	/	1	/	1
Badiotella	5	/	1	/	1	/	0
Balantioselena	5	/	1	/	1	/	4
Cyrtorostra	5	/	1	/	1	/	4
Obliquipecten	5	/	1	/	1	/	3
Peribositra	5	/	1	/	1	/	0
Pholadomya	5	/	1	/	1	/	2
Primahinnites	5	/	1	/	1	/	3
Serania	5	/	1	/	1	/	4
Shaanxiconcha	5	/	1	/	1	/	0
Sichuantrigonia	5	/	1	/	1	/	1
Taimyrodon	5	/	1	/	1	/	0
Anthracosia	4	/	1	/	1	/	6
Avichlamys	4	/	1	/	1	/	1
Cardium	4	/	1	/	1	/	0
Confusionella	4	/	1	/	1	/	0
Deltopecten	4	/	1	/	1	/	1
Dimorphoconcha	4	/	1	/	1	/	2
Hokonuia	4	/	1	/	1	/	5
Hypoanthraconaia	4	/	1	/	1	/	0
Leviconcha	4	/	1	/	1	/	0
Lilangina	4	/	1	/	1	/	3
Lyriochlamys	4	/	1	/	1	/	2
Nucula	4	/	1	/	1	/	2
Pleurophorus	4	/	1	/	1	/	0
Reubenia	4	/	1	/	1	/	2
Rhaetavicula	4	/	1	/	1	/	0
Rhynchonella	4	/	1	/	1	/	1
Trigonia	4	/	1	/	1	/	0
Yinipecten	4	/	1	/	1	/	0
Amonotis	3	/	1	/	1	/	0
Angustothyris	3	/	1	/	1	/	3
Anodontophora	3	/	1	/	1	/	1
Aviculipecten	3	/	1	/	1	/	0
Cassianoides	3	/	1	/	1	/	1
Elegantarca	3	/	1	/	1	/	2
Falcimytilus	3	/	1	/	1	/	1
Leptodesma	3	/	1	/	1	/	0
Limipecten	3	/	1	/	1	/	2
Malletia	3	/	1	/	1	/	0
Pachymya	3	/	1	/	1	/	1
Prosoleptus	3	/	1	/	1	/	0
Pseudoburmesia	3	/	1	/	1	/	0
Radulonectites	3	/	1	/	1	/	0
Retroceramus	3	/	1	/	1	/	0
Schizocardita	3	/	1	/	1	/	3
Sueroa	3	/	1	/	1	/	2
Terquemia	3	/	1	/	1	/	1
Tosapecten	3	/	1	/	1	/	0
Veteranella	3	/	1	/	1	/	0
Xinanopecten	3	/	1	/	1	/	0
Aparimella	3	/	0	/	1	/	0
Crenipecten	3	/	0	/	1	/	1
Ensipteria	3	/	0	/	1	/	3
Isopristes	3	/	0	/	1	/	2
Kobayashites	3	/	0	/	1	/	1
Kolymonectes	3	/	0	/	1	/	0
Liebea	3	/	0	/	1	/	0
Limatula	3	/	0	/	1	/	0
Manticula	3	/	0	/	1	/	3
Neomiodon	3	/	0	/	1	/	1
Nevadapecten	3	/	0	/	1	/	2
Palaeomutela	3	/	0	/	1	/	0
Pecten	3	/	0	/	1	/	0
Pichleria	3	/	0	/	1	/	0
Platymyoidea	3	/	0	/	1	/	0
Pyramus	3	/	0	/	1	/	3
Sarepta	3	/	0	/	1	/	1
Solemya	3	/	0	/	1	/	1
Waagenperna	3	/	0	/	1	/	0
Arcavicula	2	/	0	/	1	/	0
Ceratomya	2	/	0	/	1	/	1
Denguiria	2	/	0	/	1	/	1
Dunbarella	2	/	0	/	1	/	1
Evenia	2	/	0	/	1	/	1
Gresslya	2	/	0	/	1	/	2
Indonuculana	2	/	0	/	1	/	0
Joannina	2	/	0	/	1	/	1
Kalentera	2	/	0	/	1	/	0
Lapteviella	2	/	0	/	1	/	1
Maoritrigonia	2	/	0	/	1	/	0
Neoschziodus	2	/	0	/	1	/	0
Netschajewia	2	/	0	/	1	/	1
Permoperna	2	/	0	/	1	/	0
Pomarangina	2	/	0	/	1	/	0
Posidonotis	2	/	0	/	1	/	0
Praeundulomya	2	/	0	/	1	/	0
Prolaria	2	/	0	/	1	/	0
Prosogyrotrigonia	2	/	0	/	1	/	1
Spyridopecten	2	/	0	/	1	/	1
Trigondus	2	/	0	/	1	/	0
Unto	2	/	0	/	1	/	0
Wilkingia	2	/	0	/	1	/	0
Xiaoschuiculana	2	/	0	/	1	/	1
Yoldia	2	/	0	/	1	/	0
Zandaia	2	/	0	/	1	/	0
Actinodontophora	2	/	0	/	0	/	/
Agerchlamys	2	/	0	/	0	/	/
Arctotis	2	/	0	/	0	/	/
Aviculomonotis	2	/	0	/	0	/	/
Aviculopinna	2	/	0	/	0	/	/
Bellerophontidae	2	/	0	/	0	/	/
Caneyella	2	/	0	/	0	/	/
Cardiniidae	2	/	0	/	0	/	/
Conchodon	2	/	0	/	0	/	/
Cortinia	2	/	0	/	0	/	/
Grammysia	2	/	0	/	0	/	/
Krumbeckiella	2	/	0	/	0	/	/
Langsonella	2	/	0	/	0	/	/
Malimania	2	/	0	/	0	/	/
Myopholas	2	/	0	/	0	/	/
Nuculites	2	/	0	/	0	/	/
Nuculoma	2	/	0	/	0	/	/
Ochotochlamys	2	/	0	/	0	/	/
Orbicoelia	2	/	0	/	0	/	/
Ostraea	2	/	0	/	0	/	/
Palmoxytoma	2	/	0	/	0	/	/
Parahalobia	2	/	0	/	0	/	/
Prorotrigonia	2	/	0	/	0	/	/
Pseudomyoconcha	2	/	0	/	0	/	/
Pseudopermophorus	2	/	0	/	0	/	/
Quadratia	2	/	0	/	0	/	/
Schafhautlia	2	/	0	/	0	/	/
Sedgwickia	2	/	0	/	0	/	/
Sibireconcha	2	/	0	/	0	/	/
Vnigripecten	2	/	0	/	0	/	/
Volsellina	2	/	0	/	0	/	/
Aguilerella	1	/	0	/	0	/	/
Andivaugonia	1	/	0	/	0	/	/
Anomalodesmata	1	/	0	/	0	/	/
Anomia	1	/	0	/	0	/	/
Astartidae	1	/	0	/	0	/	/
Atomodesma	1	/	0	/	0	/	/
Atrina	1	/	0	/	0	/	/
Aviculomyalina	1	/	0	/	0	/	/
Calvaentolium	1	/	0	/	0	/	/
Cardinia	1	/	0	/	0	/	/
Cardinioides	1	/	0	/	0	/	/
Cardiomorpha	1	/	0	/	0	/	/
Chaenomya	1	/	0	/	0	/	/
Corbula	1	/	0	/	0	/	/
Costigervillia	1	/	0	/	0	/	/
Cubitostrea	1	/	0	/	0	/	/
Cucullaea	1	/	0	/	0	/	/
Datta	1	/	0	/	0	/	/
Dyasmya	1	/	0	/	0	/	/
Ellesmerella	1	/	0	/	0	/	/
Eopecten	1	/	0	/	0	/	/
Guizhoumyophoria	1	/	0	/	0	/	/
Gzheloceras	1	/	0	/	0	/	/
Hoferia	1	/	0	/	0	/	/
Inoceramus	1	/	0	/	0	/	/
Leda	1	/	0	/	0	/	/
Limea	1	/	0	/	0	/	/
Liotrigonia	1	/	0	/	0	/	/
Lucina	1	/	0	/	0	/	/
Lycettia	1	/	0	/	0	/	/
Lyriomyophoria	1	/	0	/	0	/	/
Macrodontella	1	/	0	/	0	/	/
Malayomaorica	1	/	0	/	0	/	/
Minetriqonia	1	/	0	/	0	/	/
Myophorella	1	/	0	/	0	/	/
Okhotodesma	1	/	0	/	0	/	/
Opisoma	1	/	0	/	0	/	/
Oretia	1	/	0	/	0	/	/
Ostracites	1	/	0	/	0	/	/
Pachycardia	1	/	0	/	0	/	/
Pectinids	1	/	0	/	0	/	/
Peribositria	1	/	0	/	0	/	/
Physocardia	1	/	0	/	0	/	/
Placuna	1	/	0	/	0	/	/
Polidevcia	1	/	0	/	0	/	/
Praechlamys	1	/	0	/	0	/	/
Prospondylus	1	/	0	/	0	/	/
Pseudaucella	1	/	0	/	0	/	/
Pseudomontis	1	/	0	/	0	/	/
Pteroperna	1	/	0	/	0	/	/
Ptychopteria	1	/	0	/	0	/	/
Rhaetidia	1	/	0	/	0	/	/
Rhaetomegalodon	1	/	0	/	0	/	/
Schafhacutlia	1	/	0	/	0	/	/
Septihoernesia	1	/	0	/	0	/	/
Septimyalina	1	/	0	/	0	/	/
Solenomorpha	1	/	0	/	0	/	/
Somareioides	1	/	0	/	0	/	/
Sphenotus	1	/	0	/	0	/	/
Undopecten	1	/	0	/	0	/	/
Unicardium	1	/	0	/	0	/	/
Xinyuella	1	/	0	/	0	/	/
