# Supplementary material for: Automatic identification and morphological comparison of bivalve and brachiopod fossils based on deep learning
Source: PeerJ. 2023 Oct 11;11:e16200. doi: 10.7717/peerj.16200 (PMC10576495; doi:10.7717/peerj.16200)
Supplement: Table S2 [file peerj-11-16200-s008.xlsx]

## Sheet: Sheet1
Appendix-Table S2
Detailed data on the number of each category (BBFID-2)
Genus	training set	detailed images	validation set	detailed images	test set	detailed images	total detailed images
Piarorhynchella	107	56	35	16	35	19	91
Juxathyris	90	50	29	17	30	19	86
Prelissorhynchia	89	50	29	11	30	14	75
Paryphella	86	0	28	0	29	1	1
Fusichonetes	84	0	27	0	28	0	0
Spiriferina	78	45	26	15	26	10	70
Araxathyris	75	39	24	12	25	12	63
Burmirhynchia	69	29	23	10	23	13	52
Pseudospiriferina	64	28	21	11	21	8	47
Tetractinella	60	19	19	6	20	7	32
Costirhynchopsis	59	29	19	13	20	11	53
Nudirostralina	57	32	19	8	19	9	49
Schwagerispira	56	27	18	5	18	9	41
Neochonetes	53	0	17	0	17	0	0
Cathaysia	52	0	17	1	17	1	2
Piarorhynchia	51	22	16	5	17	9	36
Mentzelia	48	26	15	4	16	8	38
Spinomarginifera	48	31	15	5	16	6	42
Angustothyris	43	20	14	8	14	7	35
Peltichia	42	24	13	5	14	8	37
Spirigerella	41	16	13	9	13	6	31
Bittnerithyris	38	15	12	8	12	7	30
Paracrurithyris	35	15	11	3	12	4	22
Holcorhynchella	34	19	11	5	11	8	32
Coenothyris	32	16	10	4	11	6	26
Enteletes	32	15	10	4	11	3	22
Lepismatina	32	14	10	5	11	6	25
Lingularia	32	3	10	3	11	1	7
Martinia	32	13	10	3	11	4	20
Lichuanorelloides	32	21	9	4	11	6	31
Composita	31	13	10	4	10	3	20
Spirigerellina	31	12	10	7	10	6	25
Athyris	30	/	10	/	10	/	16
Cleiothyridina	30	/	10	/	10	/	8
Norella	30	/	10	/	10	/	26
Rectambitus	30	/	10	/	10	/	26
Septaliphorioidea	30	/	9	/	10	/	21
Caucasorhynchia	29	/	9	/	10	/	26
Oxycolpella	29	/	9	/	10	/	18
Stenoscisma	29	/	9	/	10	/	15
Zygospira	29	/	9	/	10	/	22
Sanqiaothyris	28	/	9	/	9	/	22
Acosarina	26	/	8	/	8	/	12
Hustedia	26	/	8	/	8	/	17
Trigonirhynchella	26	/	8	/	8	/	20
Waagenites	26	/	8	/	8	/	3
Abrekia	25	/	8	/	8	/	20
Costispiriferina	25	/	8	/	8	/	15
Thecocyrtelloidea	25	/	8	/	8	/	25
Neocyrtina	24	/	8	/	8	/	17
Rhaetina	24	/	8	/	8	/	21
Koeveskallina	24	/	7	/	8	/	15
Linoproductus	23	/	7	/	8	/	11
Qilianoconcha	23	/	7	/	8	/	18
Rhaetinopsis	23	/	7	/	8	/	16
Yidunella	23	/	7	/	8	/	18
Omolonella	23	/	7	/	7	/	18
Lingula	22	/	7	/	7	/	0
Brachythyris	21	/	7	/	7	/	15
Notothyris	21	/	7	/	7	/	17
Adygella	21	/	6	/	7	/	17
Austriellula	21	/	6	/	7	/	19
Holcothyris	21	/	6	/	7	/	16
Permophricodothyris	20	/	6	/	7	/	10
Anchorhynchia	20	/	6	/	6	/	17
Cyrtiopsis	20	/	6	/	6	/	12
Diholkorhynchia	20	/	6	/	6	/	14
Gigantoproductus	20	/	6	/	6	/	7
Holcorhynchia	20	/	6	/	6	/	14
Murihikurhynchia	20	/	6	/	6	/	2
Perigeyerella	20	/	6	/	6	/	17
Phricodothyris	20	/	6	/	6	/	16
Sakawairhynchia	20	/	6	/	6	/	7
Aulacothyroides	19	/	6	/	6	/	15
Dictyoclostus	18	/	6	/	6	/	18
Haydenella	18	/	6	/	6	/	11
Monticulifera	18	/	6	/	6	/	10
Schizophorella	18	/	6	/	6	/	7
Zeilleria	18	/	6	/	6	/	15
Ptychomentzelia	18	/	5	/	6	/	15
Aulacothyris	17	/	5	/	6	/	13
Dagyssia	17	/	5	/	6	/	12
Goniophoria	17	/	5	/	6	/	15
Lobothyris	17	/	5	/	6	/	15
Sacothyris	17	/	5	/	6	/	13
Silesiathyris	17	/	5	/	6	/	14
Albasphe	17	/	5	/	5	/	21
Meekella	17	/	5	/	5	/	14
Tarimathyris	17	/	5	/	5	/	12
Cassianospira	16	/	5	/	5	/	11
Crurithyris	16	/	5	/	5	/	7
Orthotetina	16	/	5	/	5	/	10
Pugnoides	16	/	5	/	5	/	10
Tongzithyris	16	/	5	/	5	/	14
Derbyia	15	/	5	/	5	/	9
Euxinella	15	/	5	/	5	/	13
Flabellocyrtia	15	/	5	/	5	/	14
Kutchithyris	15	/	5	/	5	/	11
Orbiculoidea	15	/	5	/	5	/	6
Volirhynchia	15	/	5	/	5	/	16
Orbicoelia	15	/	4	/	5	/	6
Transcaucasathyris	15	/	4	/	5	/	14
Tyloplecta	15	/	4	/	5	/	7
Uncinunellina	15	/	4	/	5	/	13
Avonothyris	14	/	4	/	5	/	12
Neoplicatifera	14	/	4	/	5	/	10
Protogusarella	14	/	4	/	5	/	9
Costiferina	14	/	4	/	4	/	7
Tosuhuthyris	14	/	4	/	4	/	10
Dielasma	13	/	4	/	4	/	11
Glyptorthis	13	/	4	/	4	/	1
Kolymithyris	13	/	4	/	4	/	11
Meishanorhynchia	13	/	4	/	4	/	9
Nudispiriferina	13	/	4	/	4	/	10
Cancrinella	12	/	4	/	4	/	6
Crenispirifer	12	/	4	/	4	/	7
Kallirhynchia	12	/	4	/	4	/	10
Ortarhynchia	12	/	4	/	4	/	12
Parapygmochonetes	12	/	4	/	4	/	2
Septospirigerella	12	/	4	/	4	/	5
Sulatinella	12	/	4	/	4	/	12
Sulcorhynchia	12	/	4	/	4	/	8
Vex	12	/	4	/	4	/	6
Viligella	12	/	4	/	4	/	11
Aulacothyropsis	12	/	3	/	4	/	8
Chaohochonetes	12	/	3	/	4	/	0
Speciothyris	12	/	3	/	4	/	0
Calliomarginatia	11	/	3	/	4	/	5
Fusella	11	/	3	/	4	/	1
Laballa	11	/	3	/	4	/	5
Misunithyris	11	/	3	/	4	/	12
Obnixia	11	/	3	/	4	/	2
Pseudolaballa	11	/	3	/	4	/	7
Syringothyris	11	/	3	/	4	/	5
Yanbianella	11	/	3	/	4	/	8
Avonia	11	/	3	/	3	/	8
Janiceps	11	/	3	/	3	/	6
Merista	11	/	3	/	3	/	5
Rhipidomella	11	/	3	/	3	/	6
Schuchertella	11	/	3	/	3	/	2
Sinucosta	11	/	3	/	3	/	8
Sowerbyella	11	/	3	/	3	/	0
Tylopiecta	11	/	3	/	3	/	10
Anarhynchia	10	/	3	/	3	/	8
Anathyris	10	/	3	/	3	/	5
Anidanthus	10	/	3	/	3	/	2
Caucasorhynchella	10	/	3	/	3	/	6
Donella	10	/	3	/	3	/	6
Madoia	10	/	3	/	3	/	8
Menathyris	10	/	3	/	3	/	8
Parabrekia	10	/	3	/	3	/	8
Paranudirostralina	10	/	3	/	3	/	8
Pseudoavonia	10	/	3	/	3	/	6
Rostranteris	10	/	3	/	3	/	4
Arcosarina	9	/	3	/	3	/	7
Fusispiriter	9	/	3	/	3	/	7
Liaous	9	/	3	/	3	/	2
Lissorhynchia	9	/	3	/	3	/	6
Paramentzelia	9	/	3	/	3	/	6
Pinegathyris	9	/	3	/	3	/	5
Ptychomaletoechia	9	/	3	/	3	/	6
Qingyenia	9	/	3	/	3	/	4
Schizophoria	9	/	3	/	3	/	3
Tunethyris	9	/	3	/	3	/	9
Tylospiriferina	9	/	3	/	3	/	6
Wyndhamia	9	/	3	/	3	/	4
Alexania	9	/	2	/	3	/	4
Alphaneospirifer	9	/	2	/	3	/	7
Costatumulus	9	/	2	/	3	/	0
Eomarginifera	9	/	2	/	3	/	6
Kutorginella	9	/	2	/	3	/	7
Lobothyroides	9	/	2	/	3	/	8
Mimella	9	/	2	/	3	/	6
Orientospira	9	/	2	/	3	/	9
Paralepismatina	9	/	2	/	3	/	6
Semibrachythyrina	9	/	2	/	3	/	6
Sinolingularia	9	/	2	/	3	/	0
Sinuplicorhynchia	9	/	2	/	3	/	5
Buxtonia	8	/	2	/	3	/	8
Cartorhium	8	/	2	/	3	/	6
Delepinea	8	/	2	/	3	/	2
Echinoconchus	8	/	2	/	3	/	4
Gefonia	8	/	2	/	3	/	4
Lunaria	8	/	2	/	3	/	4
Maxillirhynchia	8	/	2	/	3	/	6
Neofascicosta	8	/	2	/	3	/	6
Pennospiriferina	8	/	2	/	3	/	6
Periallus	8	/	2	/	3	/	9
Pexidella	8	/	2	/	3	/	6
Striatifera	8	/	2	/	3	/	0
Strophomena	8	/	2	/	3	/	1
Thecospira	8	/	2	/	3	/	5
Torpidelasma	8	/	2	/	3	/	1
Tulathyris	8	/	2	/	3	/	3
Urushtenoidea	8	/	2	/	3	/	7
Zugmayerella	8	/	2	/	3	/	6
Cyrolexis	8	/	2	/	2	/	5
Dentospiriferina	8	/	2	/	2	/	7
Leiothycridina	8	/	2	/	2	/	2
Leptagonia	8	/	2	/	2	/	2
Meristella	8	/	2	/	2	/	5
Ornithella	8	/	2	/	2	/	4
Orthotichia	8	/	2	/	2	/	7
Paralenorthis	8	/	2	/	2	/	2
Parazyga	8	/	2	/	2	/	3
Peregrinella	8	/	2	/	2	/	6
Punctospirella	8	/	2	/	2	/	5
Qinghaispiriferina	8	/	2	/	2	/	4
Thecocyrtella	8	/	2	/	2	/	6
Thurmanella	8	/	2	/	2	/	6
Asioproductus	7	/	2	/	2	/	5
Aulosteges	7	/	2	/	2	/	7
Chonetes	7	/	2	/	2	/	0
Choristites	7	/	2	/	2	/	4
Neospirifer	7	/	2	/	2	/	2
Oldhamina	7	/	2	/	2	/	1
Pamirothyris	7	/	2	/	2	/	5
Posicomta	7	/	2	/	2	/	3
Scglottidia	7	/	2	/	2	/	0
Septocyclothyris	7	/	2	/	2	/	5
Stricklandia	7	/	2	/	2	/	6
Uncinuellina	7	/	2	/	2	/	6
Zhidotyris	7	/	2	/	2	/	4
Camarotoechia	6	/	2	/	2	/	6
Camerisma	6	/	2	/	2	/	4
Chonetinella	6	/	2	/	2	/	4
Koninckina	6	/	2	/	2	/	5
Neoretzia	6	/	2	/	2	/	5
Niutoushania	6	/	2	/	2	/	8
Nordathyris	6	/	2	/	2	/	2
Paradoxothyris	6	/	2	/	2	/	5
Psiloocamara	6	/	2	/	2	/	6
Pygmochonetes	6	/	2	/	2	/	0
Sichuanrhynchus	6	/	2	/	2	/	5
Spiriferella	6	/	2	/	2	/	5
Spiriferellina	6	/	2	/	2	/	3
Squamularia	6	/	2	/	2	/	6
Thedusia	6	/	2	/	2	/	2
Triplesia	6	/	2	/	2	/	6
Aequspiriferina	6	/	1	/	2	/	4
Antiquatonia	6	/	1	/	2	/	6
Aporthophyla	6	/	1	/	2	/	2
Eoseptaliphoria	6	/	1	/	2	/	4
Halorella	6	/	1	/	2	/	4
Hyattidina	6	/	1	/	2	/	1
Laevithyris	6	/	1	/	2	/	4
Lamellosathyris	6	/	1	/	2	/	2
Marginifera	6	/	1	/	2	/	4
Martiniella	6	/	1	/	2	/	5
Martiniopsis	6	/	1	/	2	/	5
Meristina	6	/	1	/	2	/	1
Muirwoodia	6	/	1	/	2	/	3
Orthothetina	6	/	1	/	2	/	0
Portneufia	6	/	1	/	2	/	6
Pseudohalorella	6	/	1	/	2	/	2
Sinorhynchia	6	/	1	/	2	/	4
Spinolepismatina	6	/	1	/	2	/	3
Ancorhynchia	5	/	1	/	2	/	2
Anisactinella	5	/	1	/	2	/	3
Betaneospirifer	5	/	1	/	2	/	2
Caucasorhynchalla	5	/	1	/	2	/	4
Cyrtospirifer	5	/	1	/	2	/	3
Excavatorhynchia	5	/	1	/	2	/	4
Gondolina	5	/	1	/	2	/	6
Halorellina	5	/	1	/	2	/	4
Hesperorthis	5	/	1	/	2	/	0
Iniathyris	5	/	1	/	2	/	2
Lacunosella	5	/	1	/	2	/	4
Megachonetes	5	/	1	/	2	/	1
Nantanella	5	/	1	/	2	/	4
Nucleusorhynchia	5	/	1	/	2	/	4
Ovatia	5	/	1	/	2	/	5
Paramonticulifera	5	/	1	/	2	/	3
Punctoapirifer	5	/	1	/	2	/	3
Richthofenia	5	/	1	/	2	/	4
Septalipghria	5	/	1	/	2	/	4
Spanodonta	5	/	1	/	2	/	3
Uniplicatorhynchia	5	/	1	/	2	/	4
Zanclorhyncha	5	/	1	/	2	/	4
Ambocoelia	5	/	1	/	1	/	3
Atrythyris	5	/	1	/	1	/	1
Bajtugania	5	/	1	/	1	/	1
Callispirina	5	/	1	/	1	/	1
Camerothyris	5	/	1	/	1	/	4
Crurirhynchia	5	/	1	/	1	/	4
Cubanothyris	5	/	1	/	1	/	3
Decurtella	5	/	1	/	1	/	4
Didymothyris	5	/	1	/	1	/	2
Gemmarcula	5	/	1	/	1	/	4
Leiolepismatina	5	/	1	/	1	/	1
Leptodus	5	/	1	/	1	/	0
Minutomarginifera	5	/	1	/	1	/	6
Nanambonites	5	/	1	/	1	/	3
Nucleospira	5	/	1	/	1	/	3
Ochotathyris	5	/	1	/	1	/	4
Permandaria	5	/	1	/	1	/	2
Plectospira	5	/	1	/	1	/	3
Praeargyrotheca	5	/	1	/	1	/	2
Pseudokalorella	5	/	1	/	1	/	2
Psioidea	5	/	1	/	1	/	4
Rugosochonetes	5	/	1	/	1	/	2
Saccorhynchia	5	/	1	/	1	/	4
Septalliphoria	5	/	1	/	1	/	3
Sipiriferellina	5	/	1	/	1	/	3
Sphaeroidothyris	5	/	1	/	1	/	5
Titanothyris	5	/	1	/	1	/	1
Tschernyschewia	5	/	1	/	1	/	3
Vediproductus	5	/	1	/	1	/	3
Xizangostrophia	5	/	1	/	1	/	4
Camarophorinella	4	/	1	/	1	/	2
Edriosteges	4	/	1	/	1	/	1
Emeithyris	4	/	1	/	1	/	1
Eospirigerina	4	/	1	/	1	/	2
Fusiproductus	4	/	1	/	1	/	2
Geyerella	4	/	1	/	1	/	4
Linguithyris	4	/	1	/	1	/	4
Orthotetes	4	/	1	/	1	/	3
Planirhynchia	4	/	1	/	1	/	3
Pseudolabaia	4	/	1	/	1	/	2
Pseudosyrinx	4	/	1	/	1	/	5
Rimirhynchopsis	4	/	1	/	1	/	2
Tenuichonetes	4	/	1	/	1	/	2
Tethyspira	4	/	1	/	1	/	4
Veghirhynchia	4	/	1	/	1	/	2
Vitiliproductus	4	/	1	/	1	/	2
Arcullina	3	/	1	/	1	/	2
Attenuatella	3	/	1	/	1	/	1
Chonetella	3	/	1	/	1	/	0
Cleiothyridellina	3	/	1	/	1	/	2
Coledium	3	/	1	/	1	/	2
Cryptospirifer	3	/	1	/	1	/	1
Cryptothyrella	3	/	1	/	1	/	1
Ctenokoninckina	3	/	1	/	1	/	3
Datangia	3	/	1	/	1	/	3
Dicamaropsis	3	/	1	/	1	/	1
Ella	3	/	1	/	1	/	3
Eumetria	3	/	1	/	1	/	1
Glyptorhynchia	3	/	1	/	1	/	1
Grandispirifer	3	/	1	/	1	/	1
Hemiptychina	3	/	1	/	1	/	2
Homoeospira	3	/	1	/	1	/	1
Lamnimargus	3	/	1	/	1	/	2
Liospiriferina	3	/	1	/	1	/	3
Mongolina	3	/	1	/	1	/	1
Overtonia	3	/	1	/	1	/	1
Pustula	3	/	1	/	1	/	0
Pyandzhelasma	3	/	1	/	1	/	3
Reticularia	3	/	1	/	1	/	3
Retziella	3	/	1	/	1	/	1
Rhynchospirina	3	/	1	/	1	/	1
Septamphiclina	3	/	1	/	1	/	2
Sulcatothyris	3	/	1	/	1	/	2
Taeniothaerus	3	/	1	/	1	/	2
Tethyochonetes	3	/	1	/	1	/	0
Tiramnia	3	/	1	/	1	/	3
Transennatia	3	/	1	/	1	/	4
Triseptothyris	3	/	1	/	1	/	2
Waagenoconcha	3	/	1	/	1	/	4
Anadyrella	3	/	0	/	1	/	2
Aporthophylina	3	/	0	/	1	/	4
Arctothyris	3	/	0	/	1	/	2
Balakhonia	3	/	0	/	1	/	1
Balanoconcha	3	/	0	/	1	/	2
Bihenithyris	3	/	0	/	1	/	2
Capillomesolobus	3	/	0	/	1	/	0
Chilianshania	3	/	0	/	1	/	0
Costinorella	3	/	0	/	1	/	1
Costispinifera	3	/	0	/	1	/	0
Costoconcha	3	/	0	/	1	/	2
Cruratula	3	/	0	/	1	/	1
Dierisma	3	/	0	/	1	/	2
Dioristella	3	/	0	/	1	/	2
Diplospirella	3	/	0	/	1	/	2
Enteletoides	3	/	0	/	1	/	2
Eocheristites	3	/	0	/	1	/	2
Epithyroides	3	/	0	/	1	/	2
Fissirhynchia	3	/	0	/	1	/	1
Girtyella	3	/	0	/	1	/	0
Gusarella	3	/	0	/	1	/	2
Hirsutella	3	/	0	/	1	/	2
Hunanospirifer	3	/	0	/	1	/	0
Laevorhynchia	3	/	0	/	1	/	2
Megaderbyia	3	/	0	/	1	/	0
Moisseievia	3	/	0	/	1	/	2
Moorellina	3	/	0	/	1	/	2
Moquellina	3	/	0	/	1	/	2
Odontospirifer	3	/	0	/	1	/	4
Ostreamontis	3	/	0	/	1	/	1
Payuella	3	/	0	/	1	/	2
Planalbus	3	/	0	/	1	/	1
Plectoconcha	3	/	0	/	1	/	2
Plicatifera	3	/	0	/	1	/	1
Pradoia	3	/	0	/	1	/	0
Pseudodielasma	3	/	0	/	1	/	2
Pseudopygoides	3	/	0	/	1	/	1
Pugilis	3	/	0	/	1	/	3
Qilianotryma	3	/	0	/	1	/	2
Semicostella	3	/	0	/	1	/	1
Tenticospirfer	3	/	0	/	1	/	2
Terebratuloidea	3	/	0	/	1	/	1
Timorhynchia	3	/	0	/	1	/	2
Triathyris	3	/	0	/	1	/	0
Whitfieldella	3	/	0	/	1	/	1
Yanguania	3	/	0	/	1	/	3
Anathyrella	2	/	0	/	1	/	1
Anathyria	2	/	0	/	1	/	1
Bathymyonia	2	/	0	/	1	/	2
Beecheria	2	/	0	/	1	/	1
Brachythyrina	2	/	0	/	1	/	2
Cardiothyris	2	/	0	/	1	/	0
Charionella	2	/	0	/	1	/	1
Chonostegoides	2	/	0	/	1	/	2
Cirpa	2	/	0	/	1	/	2
Comelicania	2	/	0	/	1	/	2
Compressoproductus	2	/	0	/	1	/	1
Dareithyris	2	/	0	/	1	/	2
Fluctuaria	2	/	0	/	1	/	1
Furcirhynchia	2	/	0	/	1	/	2
Fusichonete	2	/	0	/	1	/	0
Kochiproductus	2	/	0	/	1	/	2
Kotlaia	2	/	0	/	1	/	0
Majkopella	2	/	0	/	1	/	1
Marginirugus	2	/	0	/	1	/	1
Mentzelioides	2	/	0	/	1	/	1
Microcardinalia	2	/	0	/	1	/	1
Notolosia	2	/	0	/	1	/	1
Ogbinia	2	/	0	/	1	/	1
Ombonia	2	/	0	/	1	/	0
Orthambonites	2	/	0	/	1	/	0
Paramarginatia	2	/	0	/	1	/	1
Pergeyerella	2	/	0	/	1	/	1
Plicathyris	2	/	0	/	1	/	0
Praewaagenoconcha	2	/	0	/	1	/	1
Propygope	2	/	0	/	1	/	1
Pseudojisuina	2	/	0	/	1	/	0
Pseudopentagonia	2	/	0	/	1	/	1
Pseudoprotathyris	2	/	0	/	1	/	1
Reticulatia	2	/	0	/	1	/	1
Rhynchonella	2	/	0	/	1	/	2
Wadispirifer	2	/	0	/	1	/	1
Weiningia	2	/	0	/	1	/	1
Actinoconchus	2	/	0	/	0	/	/
Billingsella	2	/	0	/	0	/	/
Chaoiella	2	/	0	/	0	/	/
Chenxianoproductus	2	/	0	/	0	/	/
Colongina	2	/	0	/	0	/	/
Condrathyris	2	/	0	/	0	/	/
Costispinfera	2	/	0	/	0	/	/
Cranaena	2	/	0	/	0	/	/
Crassispirifer	2	/	0	/	0	/	/
Dinarispira	2	/	0	/	0	/	/
Elivina	2	/	0	/	0	/	/
Eochoristites	2	/	0	/	0	/	/
Floweria	2	/	0	/	0	/	/
Glassina	2	/	0	/	0	/	/
Glyptomena	2	/	0	/	0	/	/
Gruntallina	2	/	0	/	0	/	/
Hiscobeccus	2	/	0	/	0	/	/
Keyserlingina	2	/	0	/	0	/	/
Lingulodiscina	2	/	0	/	0	/	/
Magniderbyia	2	/	0	/	0	/	/
Protathyris	2	/	0	/	0	/	/
Quizhouspirifer	2	/	0	/	0	/	/
Rhynchopora	2	/	0	/	0	/	/
Rugivestis	2	/	0	/	0	/	/
Rugosomarginifera	2	/	0	/	0	/	/
Schellwienella	2	/	0	/	0	/	/
Streptorhynchus	2	/	0	/	0	/	/
Tenticospirifer	2	/	0	/	0	/	/
Tschatkalia	2	/	0	/	0	/	/
Tylothyris	2	/	0	/	0	/	/
Uldziathyris	2	/	0	/	0	/	/
Yakovlevia	2	/	0	/	0	/	/
Amphiclina	1	/	0	/	0	/	/
Chaoina	1	/	0	/	0	/	/
Dongbarlla	1	/	0	/	0	/	/
Echinauris	1	/	0	/	0	/	/
Ehlersella	1	/	0	/	0	/	/
Eolyttonia	1	/	0	/	0	/	/
Falafer	1	/	0	/	0	/	/
Gubleria	1	/	0	/	0	/	/
Krotovia	1	/	0	/	0	/	/
Lammellokoninckina	1	/	0	/	0	/	/
Lampangella	1	/	0	/	0	/	/
Nanorthis	1	/	0	/	0	/	/
Plicochonetes	1	/	0	/	0	/	/
Pomatospirella	1	/	0	/	0	/	/
Purdonella	1	/	0	/	0	/	/
Semiplanus	1	/	0	/	0	/	/
Striochonetes	1	/	0	/	0	/	/
Terebratuloidera	1	/	0	/	0	/	/
